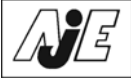

## Brief Original Contribution

# Radon and Nonrespiratory Mortality in the American Cancer Society Cohort

Michelle C. Turner\*, Daniel Krewski, Yue Chen, C. Arden Pope III, Susan M. Gapstur, and Michael J. Thun

\* Correspondence to Michelle C. Turner, McLaughlin Centre for Population Health Risk Assessment, Institute of Population Health, University of Ottawa, One Stewart Street, Room 313, Ottawa, Ontario, Canada K1N 6N5 (e-mail: mturner@uottawa.ca).

Initially submitted December 17, 2011; accepted for publication March 28, 2012.

Radon is a known cause of human lung cancer. Previously, the authors observed a significant positive association between mean county-level residential radon concentrations and lung cancer mortality in the Cancer Prevention Study II (CPS-II), a large prospective study of nearly 1.2 million participants recruited in 1982 by the American Cancer Society. There was also a significant positive association with mortality from chronic obstructive pulmonary disease. Because it is unclear whether radon is associated with mortality from other malignant or nonmalignant disease, the authors examined the association between radon and nonrespiratory mortality in the CPS-II. Mean county-level residential radon concentrations (mean = 53.5 (standard deviation: 38.0) Bq/m<sup>3</sup>) were linked to participants by their zip code at enrollment. Cox proportional hazards regression models were used to estimate adjusted hazard ratios and 95% confidence intervals for all-cause (excluding lung cancer and respiratory mortality) and cause-specific mortality associated with radon concentrations. A total of 811,961 participants in 2,754 counties were analyzed, including 265,477 deaths through 2006. There were no clear associations between radon and nonrespiratory mortality in the CPS-II. These findings suggest that residential radon is not associated with any other mortality beyond lung cancer or chronic obstructive pulmonary disease.

cardiovascular diseases; cohort studies; neoplasms; radon; United States

Abbreviations: CI, confidence interval; COPD, chronic obstructive pulmonary disease; CPS-II, Cancer Prevention Study II; HR, hazard ratio; LBL, Lawrence Berkeley National Laboratory.

Radon-222 is a naturally occurring gas formed during the radioactive decay of uranium-238. Radon further decays into a series of daughters, some of which emit alpha particles capable of damaging cellular DNA (1). Radon is found in the indoor and outdoor air, soil, and water and accumulates in confined spaces, including underground mines and in the lower living areas of homes (2). In 1988, radon and its decay products were designated a human lung carcinogen on the basis of experimental evidence and studies of underground miners exposed to high levels of the gas (3). Recent combined analyses of data from residential radon case-control studies conducted in North America and Europe have strengthened the epidemiologic evidence linking residential radon and lung cancer (4–8).

Although there have been a number of residential radon case-control studies, there have been few prospective studies in the general population. We recently observed a significant positive association between mean county-level residential radon concentrations and lung cancer mortality in the American Cancer Society Cancer Prevention Study II (CPS-II) (per 100 Bq/m<sup>3</sup>: hazard ratio (HR) = 1.15, 95% confidence interval (CI): 1.01, 1.31) (9). Participants with mean radon concentrations above the US Environmental Protection Agency (EPA) guideline value (4 pCi/L ~ 148 Bq/m<sup>3</sup>) (10) experienced a 34% (95% CI: 7, 68) increased risk of lung cancer death.

Although it is conceivable that radon may affect other malignant or nonmalignant diseases besides lung cancer,

the epidemiologic evidence is sparse (10, 11). A pooled analysis of data from 11 cohorts of underground miners reported excess mortality from stomach cancer, liver cancer, and leukemia that was unrelated to radon exposure (12). A French cohort study showed an increased mortality from lung and kidney cancer in uranium miners that was not associated with cumulative radon exposure (13). There was also a significant positive association between radon and mortality from cerebrovascular disease; however, potential confounding by cardiovascular risk factors could not be assessed (14). Mortality from multiple myeloma and non-Hodgkin's lymphoma was not related to cumulative radon exposure in the Colorado Plateau cohort (15). There was no strong evidence for an association between radon and death from extrapulmonary cancer in the German uranium miners' cohort (16). However, radon was positively associated with incident chronic lymphocytic leukemia (relative risk = 1.98, 95% CI: 1.10, 3.59) in Czech uranium miners (17).

Although ecologic analyses have reported positive associations between residential radon and leukemia, case-control studies have not supported a link (18). Excesses in total and site-specific (colorectal, breast, kidney, and prostate) cancer incidence were observed in census tracts with elevated groundwater uranium concentrations in a South Carolina study; however, there were no individual-level risk factor data (19). No association between radon or other drinking water radionuclides and leukemia, stomach, bladder, or kidney cancer was observed in Finland (20–22).

This paper examines the association between residential radon and nonrespiratory mortality in the CPS-II. CPS-II is a large, well-established, prospective study, with detailed individual-level risk factor data collected at enrollment. In the CPS-II, we recently observed a significant positive association between mean county-level residential radon concentrations and chronic obstructive pulmonary disease (COPD) mortality (per 100 Bq/m<sup>3</sup>: HR = 1.13, 95% CI: 1.05, 1.21) (23). It provides a unique resource to evaluate whether residential exposure to radon is associated with other nonrespiratory causes of death. Some of the results presented here were previously reported in an abstract (24).

## MATERIALS AND METHODS

### Study population

CPS-II is a prospective study of nearly 1.2 million participants enrolled in 1982. Participants, largely friends and family members of volunteer recruiters, were recruited in all 50 US states, the District of Columbia, and Puerto Rico. Participants were at least 30 years of age and had at least 1 family member aged 45 years or older. A 4-page self-administered questionnaire was completed at enrollment that captured data on a range of demographic, lifestyle, and medical factors, including zip code of residence at enrollment.

Follow-up for vital status is conducted every 2 years. In 1984, 1986, and 1988, vital status was obtained from volunteer recruiters and death certificate information. From

**Table 1.** Distribution of Selected Characteristics among Cancer Prevention Study II Cohort Participants at Enrollment in 1982

| Characteristic               | No.     | %    | Mean Radon, Bq/m <sup>3</sup> (SD) <sup>a</sup> |
|------------------------------|---------|------|-------------------------------------------------|
| Overall                      | 811,961 | 100  | 53.5 (38.0)                                     |
| Age at enrollment, years     |         |      |                                                 |
| <40                          | 37,262  | 4.6  | 50.1 (35.4)                                     |
| 40–49                        | 173,768 | 21.4 | 54.0 (37.9)                                     |
| 50–59                        | 297,108 | 36.6 | 54.2 (38.5)                                     |
| 60–69                        | 213,231 | 26.3 | 53.1 (38.0)                                     |
| 70–79                        | 76,633  | 9.4  | 52.4 (37.5)                                     |
| ≥80                          | 13,959  | 1.7  | 51.9 (36.9)                                     |
| Race                         |         |      |                                                 |
| White                        | 770,352 | 94.9 | 54.2 (38.2)                                     |
| Black                        | 29,832  | 3.7  | 40.2 (28.3)                                     |
| Other                        | 11,777  | 1.5  | 39.3 (32.1)                                     |
| Sex                          |         |      |                                                 |
| Male                         | 362,600 | 44.7 | 53.8 (38.2)                                     |
| Female                       | 449,361 | 55.3 | 53.2 (37.8)                                     |
| Education                    |         |      |                                                 |
| Less than high school        | 106,668 | 13.1 | 55.2 (38.9)                                     |
| High school                  | 262,853 | 32.4 | 56.8 (39.5)                                     |
| More than high school        | 442,440 | 54.5 | 51.1 (36.6)                                     |
| Body mass index <sup>b</sup> |         |      |                                                 |
| <18.5                        | 13,685  | 1.7  | 50.3 (36.1)                                     |
| 18.5–24.9                    | 402,003 | 49.5 | 52.2 (37.2)                                     |
| 25–29.9                      | 299,755 | 36.9 | 54.6 (38.6)                                     |
| ≥30                          | 96,518  | 11.9 | 55.6 (39.1)                                     |
| Marital status               |         |      |                                                 |
| Single                       | 25,564  | 3.2  | 51.7 (36.7)                                     |
| Married                      | 691,267 | 85.1 | 54.1 (38.2)                                     |
| Other                        | 95,130  | 11.7 | 49.7 (36.0)                                     |
| Cigarette smoking status     |         |      |                                                 |
| Never                        | 375,087 | 46.2 | 55.5 (39.0)                                     |
| Current                      | 152,033 | 18.7 | 51.5 (36.4)                                     |
| Former                       | 203,253 | 25.0 | 51.2 (36.9)                                     |
| Pipe/cigar only              | 81,588  | 10.1 | 53.4 (37.9)                                     |
| Region                       |         |      |                                                 |
| Northeast                    | 170,281 | 21.0 | 58.3 (42.3)                                     |
| South                        | 257,243 | 31.7 | 35.6 (21.7)                                     |
| Midwest                      | 234,952 | 28.9 | 73.7 (36.6)                                     |
| West                         | 149,485 | 18.4 | 46.9 (40.3)                                     |

<sup>a</sup> Lawrence Berkeley National Laboratory.

<sup>b</sup> Body mass index: weight (kg)/height (m)<sup>2</sup>.

1989, follow-up has been conducted through computerized linkage to the National Death Index (25). In September 1988, follow-up was terminated for 2,840 (0.2%) participants because of insufficient information to link to the National

**Table 2.** Adjusted Hazard Ratios for All-Cause (Excluding Lung Cancer and Respiratory Mortality) and Cause-specific Mortality per Each 100-Bq/m<sup>3</sup> Increase in Mean County-Level Residential Radon Concentrations,<sup>a</sup> Cancer Prevention Study II Cohort Follow-up, 1982–2006

| Cause of Death                                                        | ICD-9 and ICD-10 Codes                                      | No. of Deaths | Minimally Adjusted <sup>b</sup> |            | Fully Adjusted <sup>c</sup> |            |
|-----------------------------------------------------------------------|-------------------------------------------------------------|---------------|---------------------------------|------------|-----------------------------|------------|
|                                                                       |                                                             |               | HR                              | 95% CI     | HR                          | 95% CI     |
| All-cause mortality (excluding lung cancer and respiratory mortality) | All-cause mortality minus 162; C33–C34 and 460–519; J00–J98 | 265,477       | 0.96                            | 0.95, 0.98 | 0.98                        | 0.97, 1.00 |
| Diseases of the circulatory system (plus diabetes)                    | 250, 390–459; E10–E14, I00–I99                              | 142,272       | 0.96                            | 0.94, 0.98 | 0.98                        | 0.96, 1.00 |
| Ischemic heart disease                                                | 410–414; I20–I25                                            | 61,790        | 0.95                            | 0.92, 0.99 | 0.97                        | 0.94, 1.01 |
| Dysrhythmias, heart failure, cardiac arrest                           | 420–429; I30–I51                                            | 25,172        | 0.95                            | 0.90, 1.00 | 0.97                        | 0.92, 1.02 |
| Hypertensive disease                                                  | 401–405; I10–I13                                            | 4,213         | 0.87                            | 0.76, 0.99 | 0.89                        | 0.78, 1.02 |
| Other atherosclerosis and aortic aneurysms                            | 440–441; I70–I71                                            | 4,964         | 0.86                            | 0.76, 0.96 | 0.90                        | 0.80, 1.01 |
| Cerebrovascular disease                                               | 430–438; I60–I69                                            | 23,344        | 1.03                            | 0.98, 1.09 | 1.05                        | 0.99, 1.10 |
| Diabetes                                                              | 250; I10–E14                                                | 6,954         | 1.02                            | 0.93, 1.12 | 1.02                        | 0.93, 1.12 |
| All other cardiovascular diseases                                     | All not specified                                           | 15,835        | 0.94                            | 0.88, 1.00 | 0.96                        | 0.90, 1.02 |
| All cancer (excluding lung cancer)                                    | 140–208; C00–C75, C80, C97 minus 162; C33–C34               | 62,309        | 0.96                            | 0.93, 0.99 | 0.97                        | 0.94, 1.00 |
| Malignant neoplasms of lymphatic and hematopoietic tissue             | 200–208; C81–C96                                            | 10,142        | 0.96                            | 0.89, 1.04 | 0.97                        | 0.89, 1.04 |
| Non-Hodgkin's lymphoma                                                | 200, 202; C82–C85                                           | 4,053         | 1.01                            | 0.90, 1.14 | 1.02                        | 0.90, 1.14 |
| Hodgkin's disease                                                     | 201; C81                                                    | 172           | 0.98                            | 0.55, 1.72 | 0.95                        | 0.54, 1.68 |
| Multiple myeloma                                                      | 203; C88, C90                                               | 2,075         | 0.95                            | 0.80, 1.13 | 0.93                        | 0.78, 1.11 |
| Leukemia                                                              | 204–208; C91–C95                                            | 3,835         | 0.91                            | 0.81, 1.04 | 0.93                        | 0.82, 1.05 |
| Malignant neoplasms of lip, oral cavity, and pharynx                  | 140–149; C00–C14                                            | 834           | 0.74                            | 0.55, 1.01 | 0.80                        | 0.59, 1.08 |
| Tongue and mouth                                                      | 141, 143–145; C01–C06                                       | 370           | 0.83                            | 0.55, 1.25 | 0.86                        | 0.57, 1.30 |
| Salivary gland                                                        | 142; C07–C08                                                | 85            | 0.24                            | 0.07, 0.84 | 0.24                        | 0.07, 0.85 |
| Pharynx                                                               | 146–149; C09–C14                                            | 352           | 0.91                            | 0.56, 1.47 | 0.99                        | 0.62, 1.60 |
| Malignant neoplasms of digestive organs and peritoneum                | 150–159; C15–C26, C48                                       | 20,854        | 0.94                            | 0.89, 0.99 | 0.96                        | 0.91, 1.02 |
| Esophagus                                                             | 150; C15                                                    | 1,625         | 1.02                            | 0.84, 1.23 | 1.08                        | 0.89, 1.30 |
| Stomach                                                               | 151; C16                                                    | 1,880         | 0.84                            | 0.69, 1.01 | 0.85                        | 0.70, 1.03 |
| Colorectal                                                            | 153–154; C18–C21                                            | 9,165         | 0.92                            | 0.85, 1.00 | 0.94                        | 0.87, 1.02 |
| Liver                                                                 | 155; C22                                                    | 1,526         | 0.86                            | 0.70, 1.06 | 0.89                        | 0.73, 1.10 |
| Gallbladder                                                           | 156; C23–C24                                                | 530           | 1.03                            | 0.74, 1.45 | 1.07                        | 0.77, 1.50 |
| Pancreas                                                              | 157; C25                                                    | 5,441         | 1.01                            | 0.90, 1.12 | 1.03                        | 0.92, 1.14 |

Table continues

Death Index. Over 99% of all known deaths have been assigned a cause. Deaths were classified by the underlying cause according to the *International Classification of Diseases*, Ninth Revision and Tenth Revision (26, 27).

Of the total 1,184,881 participants, those with missing vital status ( $n = 419$ ), prevalent cancer (except nonmelanoma skin cancer) at enrollment ( $n = 82,329$ ), missing zip code ( $n = 99,479$ ) or county data ( $n = 22,872$ ), missing data on radon ( $n = 5,836$ ), or any other individual-level covariates of interest ( $n = 161,985$ ) were excluded. A total of 811,961 participants residing in 2,754 counties were retained for analysis. Through 2006, a total of 314,311 deaths in 16,554,617 person-years of follow-up were observed, of which 265,477 were due to causes other than lung cancer or respiratory mortality.

### Ecologic measures of residential radon

Participants were assigned to a primary county of residence on the basis of the 5-digit zip code provided at enrollment, according to the boundaries (Summary Tape File 3B) of the 1980 US Census (28). Two ecologic measures of residential radon concentrations were linked to study participants as indicators of historical radon exposure. A detailed description is provided elsewhere (9). In brief, researchers at the Lawrence Berkeley National Laboratory (LBL) used a variety of short- and long-term indoor radon-monitoring data (mid to late 1980s) along with a variety of geologic, soil, meteorologic, and housing data, to predict the annual average radon concentrations in the main living areas of homes in 3,079 US counties using an empirical

Table 2. Continued

| Cause of Death                                                                          | ICD-9 and ICD-10 Codes              | No. of Deaths | Minimally Adjusted <sup>b</sup> |            | Fully Adjusted <sup>c</sup> |            |
|-----------------------------------------------------------------------------------------|-------------------------------------|---------------|---------------------------------|------------|-----------------------------|------------|
|                                                                                         |                                     |               | HR                              | 95% CI     | HR                          | 95% CI     |
| Malignant neoplasms of the respiratory and intrathoracic organs (excluding lung cancer) | 160–165; C30–C39 minus 162; C33–C34 | 740           | 0.91                            | 0.70, 1.19 | 0.95                        | 0.73, 1.24 |
| Nose                                                                                    | 160; C30–C31                        | 67            | 1.34                            | 0.62, 2.87 | 1.47                        | 0.69, 3.17 |
| Larynx                                                                                  | 161; C32                            | 314           | 0.94                            | 0.61, 1.45 | 1.06                        | 0.69, 1.62 |
| Malignant neoplasms of bone, connective tissue, skin, and breast                        | 170–175; C40–C44, C46–C47, C49–C50  | 7,733         | 0.94                            | 0.86, 1.02 | 0.95                        | 0.87, 1.04 |
| Bone                                                                                    | 170; C40–C41                        | 104           | 1.15                            | 0.57, 2.32 | 1.19                        | 0.60, 2.38 |
| Connective tissue                                                                       | 171; C47, C49                       | 538           | 1.10                            | 0.80, 1.50 | 1.10                        | 0.80, 1.51 |
| Melanoma                                                                                | 172; C43                            | 1,247         | 1.08                            | 0.88, 1.33 | 1.08                        | 0.88, 1.33 |
| Other skin                                                                              | 173; C44, C46                       | 313           | 0.67                            | 0.40, 1.13 | 0.70                        | 0.42, 1.19 |
| Breast (female) <sup>d</sup>                                                            | 174–175; C50                        | 5,479         | 0.89                            | 0.80, 0.99 | 0.91                        | 0.82, 1.01 |
| Malignant neoplasms of the genitourinary organs                                         | 179–189; C51–C68                    |               |                                 |            |                             |            |
| Uterus <sup>d,e</sup>                                                                   | 179, 182; C54–C55                   | 906           | 1.15                            | 0.90, 1.47 | 1.16                        | 0.90, 1.48 |
| Cervix <sup>d,e</sup>                                                                   | 180; C53                            | 184           | 0.64                            | 0.34, 1.20 | 0.70                        | 0.37, 1.31 |
| Ovary <sup>d,e,f</sup>                                                                  | 183; C56                            | 1,316         | 0.91                            | 0.74, 1.12 | 0.91                        | 0.74, 1.13 |
| Prostate <sup>d</sup>                                                                   | 185; C61                            | 1,374         | 0.98                            | 0.79, 1.23 | 0.99                        | 0.79, 1.23 |
| Bladder                                                                                 | 188; C67                            | 1,933         | 1.07                            | 0.90, 1.27 | 1.11                        | 0.94, 1.32 |
| Kidney                                                                                  | 189; C64–C66, C68                   | 1,251         | 0.92                            | 0.74, 1.14 | 0.94                        | 0.76, 1.16 |
| Malignant neoplasms of other and unspecified sites                                      | 190–199; C69–C80, C97               | 7,803         | 0.91                            | 0.84, 1.00 | 0.94                        | 0.86, 1.02 |
| Eye                                                                                     | 190; C69                            | 46            | 0.64                            | 0.19, 2.22 | 0.65                        | 0.19, 2.25 |
| Brain                                                                                   | 191; C71                            | 2,232         | 0.99                            | 0.84, 1.16 | 0.98                        | 0.83, 1.15 |
| Thyroid                                                                                 | 193; C73                            | 55            | 1.05                            | 0.32, 3.48 | 1.10                        | 0.34, 3.53 |
| Benign neoplasms                                                                        | 210–229; D10–D36                    | 284           | 1.19                            | 0.77, 1.83 | 1.18                        | 0.77, 1.82 |
| All other causes                                                                        | All other not specified             | 60,612        | 0.98                            | 0.95, 1.01 | 0.99                        | 0.96, 1.03 |

Abbreviations: CI, confidence interval; HR, hazard ratio; ICD-9, *International Classification of Diseases*, Ninth Revision; ICD-10, *International Classification of Diseases*, Tenth Revision.

<sup>a</sup> Lawrence Berkeley National Laboratory.

<sup>b</sup> Age, race, gender, and state stratified.

<sup>c</sup> Age, race, gender, and state stratified and adjusted for education, marital status, body mass index, body mass index squared, cigarette smoking status, cigarettes per day, cigarettes per day squared, duration of smoking, duration of smoking squared, age started smoking, passive smoking, vegetable/fruit/fiber consumption, fat consumption, industrial exposures, and occupation dirtiness index.

<sup>d</sup> As above but not gender stratified.

<sup>e</sup> Females reporting a previous hysterectomy or an artificial menopause ( $n = 143,991$ ) excluded here.

<sup>f</sup> Females reporting having undergone an ovarian surgery ( $n = 9,232$ ) also excluded here.

statistical model (29, 30). Cohen (31–33) compiled a series of screening measurements in a nonrandom sample of homes in 1,601 US counties made by researchers at the University of Pittsburgh, the US Environmental Protection Agency, and other state-level sources (mid 1980s to the early 1990s). Counties with less than 10 measurements or states with high rates of migration (Florida, California, Arizona) were excluded, and data were normalized to the long-term US National Residential Radon Survey (2). County-level residential radon concentrations (LBL) ranged from 6.3 to 265.7 Bq/m<sup>3</sup> (1 pCi/L = 37 Bq/m<sup>3</sup>), with a mean value of 53.5 (standard deviation: 38.0) Bq/m<sup>3</sup>.

### Statistical analysis

Cox proportional hazards regression models were used to examine the independent effects of radon on all-cause (excluding lung cancer and respiratory mortality) and cause-specific mortality (34). The baseline hazard in the proportional hazards model was stratified by 1-year age categories, sex, race (white, black, other), and state of residence. Follow-up time since enrollment in 1982 was used as the time axis. The survival times of those still alive at the end of follow-up were censored.

Estimated hazard ratios and 95% Wald-based confidence intervals were adjusted for a range of individual-level risk



factors including education, marital status, body mass index, body mass index squared, cigarette smoking status, and intensity (cigarettes per day, cigarettes per day squared, years smoked, and years smoked squared), age started smoking less than 18 years, passive smoking (home, work, other), quintiles of vegetable/fruit/fiber and fat intake, occupational exposures (asbestos, chemicals/acids/solvents, coal or stone dusts, coal tar/pitch/asphalt, formaldehyde, diesel engine exhaust), and an “occupational dirtiness index” (9, 23, 35).

The proportional hazards assumption was tested by assessing the significance of an interaction term between radon and follow-up time. Analyses were conducted by using SAS, version 9.2, software (36). Ethics approval was obtained from the Emory University Institutional Review Board and the Ottawa Hospital Research Ethics Board.

## RESULTS

The distribution of participant characteristics at enrollment is presented in Table 1. The majority of participants were between 40 and 69 years of age, had more than a high school education, and were never smokers. There was a tendency for higher radon concentrations to be observed among participants who were white, had a lower level of educational attainment, had a higher body mass index, or were never smokers. The highest radon concentrations were observed in the Midwest and Northeast and the lowest in the South.

Table 2 presents adjusted hazard ratios for all-cause (excluding lung cancer and respiratory mortality) and cause-specific mortality in relation to each 100-Bq/m<sup>3</sup> increase in radon concentrations (LBL). In the fully adjusted model, there was no significant association between radon and all nonrespiratory mortality (per each 100 Bq/m<sup>3</sup>: HR = 0.98, 95% CI: 0.97, 1.00). There was also no association between radon and any other specific cause of death category, with the exception of mortality from salivary gland tumors where a significant inverse association was observed (per each 100 Bq/m<sup>3</sup>: HR = 0.24, 95% CI: 0.07, 0.85). There was no evidence that the proportional hazards assumption was violated for any specific cause of death category ( $P \geq 0.05$ ), with the exception of ischemic heart disease mortality with hazard ratios of 0.91 (95% CI: 0.85, 0.97) (1982–1989), 0.95 (95% CI: 0.90, 1.00) (1990–1999), and 1.04 (95% CI: 0.99, 1.09) (2000–2006) observed per each 100 Bq/m<sup>3</sup> of radon.

Results using Cohen’s data are presented in Web Table 1. In the fully adjusted model, there was no association between radon and all-cause mortality (excluding lung cancer and respiratory mortality) (per each 100 Bq/m<sup>3</sup>: HR = 0.99, 95% CI: 0.97, 1.01). However, significant positive associations were observed between radon and mortality from cerebrovascular disease (per each 100 Bq/m<sup>3</sup>: HR = 1.07, 95% CI: 1.01, 1.14) and benign neoplasms (per each 100 Bq/m<sup>3</sup>: HR = 1.69, 95% CI: 1.05, 2.75). There were also significant inverse associations observed for mortality from hypertensive disease (per each 100 Bq/m<sup>3</sup>: HR = 0.78, 95% CI: 0.66, 0.91) and stomach cancer (per each 100 Bq/m<sup>3</sup>: HR = 0.74, 95% CI: 0.59, 0.93).

## DISCUSSION

We previously observed significant positive associations between mean county-level residential radon concentrations and mortality from both lung cancer and COPD in the CPS-II (9, 23). Results from the present study provided no clear evidence of associations between radon and nonrespiratory mortality. Although there was a significant inverse association between radon and mortality from cancer of the salivary gland (LBL), there is little biologic plausibility to support this finding, and there were few salivary tumor deaths. Some significant increases in mortality (cerebrovascular disease, benign neoplasms) with radon were observed by using Cohen’s data; however, they were not replicated in the larger LBL cohort.

Strengths of this study include its large prospective design, the ability to examine multiple endpoints other than lung cancer, and detailed individual-level risk factor data collected at enrollment. Limitations include a mortality-based design and the use of ecologic measures of radon concentrations estimated in a statistical model (LBL) or based on a nonrandom series of short-term measurements (Cohen). Errors in radon detector measurements, seasonal and yearly variability in radon concentrations, changes in housing characteristics over time, and sampling errors may occur (37–39). Residential radon concentrations within counties can also exhibit considerable variability due to differential construction and underlying geologic characteristics of individual homes (37, 38, 40, 41). Radon exposures may also be experienced outside the home (workplace, outdoor exposures). However, estimates of increased lung cancer mortality in the CPS-II were compatible with estimates from combined analyses of case-control studies (9). No updated data on cigarette smoking or residential mobility were available beyond enrollment in the full CPS-II, nor were any time-activity data collected, such as individual mobility within or outside the home (6, 7, 42). However, with a mean age of 57 years at enrollment, it is unlikely that participants would begin smoking during follow-up. Radon concentrations and cigarette smoking are also inversely related (4, 5, 9, 43). Participants also tended to be long-term residents of their current neighborhood at enrollment (9).

These findings suggest that residential radon is not associated with mortality beyond lung cancer or COPD. Although the lung and respiratory tract experience the highest doses of ionizing radiation from the inhalation of radon and its decay products, the kidney, bone, bone marrow, and breast are also exposed, as well as the stomach (ingestion) and skin (external radiation), although to a lesser degree (10, 44). Further research examining associations between radon and nonrespiratory disease incidence may be useful to further confirm these findings.

## ACKNOWLEDGMENTS

Author affiliations: Faculty of Graduate and Postdoctoral Studies, University of Ottawa, Ottawa, Ontario, Canada

(Michelle C. Turner); McLaughlin Center for Population Health Risk Assessment, Institute of Population Health, University of Ottawa, Ottawa, Ontario, Canada (Michelle C. Turner, Daniel Krewski); Department of Epidemiology and Community Medicine, Faculty of Medicine, University of Ottawa, Ottawa, Ontario, Canada (Daniel Krewski, Yue Chen); Risk Sciences International, Ottawa, Ontario, Canada (Daniel Krewski); Department of Economics, Brigham Young University, Provo, Utah (C. Arden Pope III); and Epidemiology Research Program, American Cancer Society, Atlanta, Georgia (Susan M. Gapstur, Michael J. Thun).

M. C. T. was supported by a Canada Graduate Scholarship from the Canadian Institutes of Health Research. D. K. is the Natural Sciences and Engineering Research Council Chair in Risk Science at the University of Ottawa.

The authors would like to thank Dr. Jeanne Calle for valuable contributions in the development of the study.

Conflict of interest: none declared.

## REFERENCES

- National Research Council. *Health Risks of Radon and Other Internally Deposited Alpha-Emitters*. Washington, DC: National Academy Press; 1988.
- Marcinowski F, Lucas RM, Yeager WM. National and regional distributions of airborne radon concentrations in U.S. homes. *Health Phys*. 1994;66(6):699–706.
- International Agency for Research on Cancer. *Monographs on the Evaluation of Carcinogenic Risk to Humans: Manmade Fibres and Radon*. Lyon, France: International Agency for Research on Cancer; 1988.
- Darby S, Hill D, Auvinen A, et al. Radon in homes and risk of lung cancer: collaborative analysis of individual data from 13 European case-control studies. *BMJ*. 2005;330(7485):223. (doi:10.1136/bmj.38308.477650.63).
- Darby S, Hill D, Deo H, et al. Residential radon and lung cancer—detailed results of a collaborative analysis of individual data on 7148 persons with lung cancer and 14,208 persons without lung cancer from 13 epidemiologic studies in Europe. *Scand J Work Environ Health*. 2006;32(suppl 1):1–83.
- Krewski D, Lubin JH, Zielinski JM, et al. Residential radon and risk of lung cancer: a combined analysis of 7 North American case-control studies. *Epidemiology*. 2005;16(2):137–145.
- Krewski D, Lubin JH, Zielinski JM, et al. A combined analysis of North American case-control studies of residential radon and lung cancer. *J Toxicol Environ Health A*. 2006;69(7):533–597.
- El Ghissassi F, Baan R, Straif K, et al. A review of human carcinogens—part D: radiation. WHO International Agency for Research on Cancer Monograph Working Group. *Lancet Oncol*. 2009;10(8):751–752.
- Turner MC, Krewski D, Chen Y, et al. Radon and lung cancer in the American Cancer Society cohort. *Cancer Epidemiol Biomarkers Prev*. 2011;20(3):438–448.
- National Research Council. *Health Effects of Exposure to Radon (BIER VI)*. Washington, DC: National Academy Press; 1999.
- World Health Organization. *WHO Handbook on Indoor Radon. A Public Health Perspective*. Geneva, Switzerland: World Health Organization; 2009.
- Darby SC, Whitley E, Howe GR, et al. Radon and cancers other than lung cancer in underground miners: a collaborative analysis of 11 studies. *J Natl Cancer Inst*. 1995;87(5):378–384.
- Vacquier B, Caer S, Rogel A, et al. Mortality risk in the French cohort of uranium miners: extended follow-up 1946–1999. *Occup Environ Med*. 2008;65(9):597–604.
- Nusinovici S, Vacquier B, Leuraud K, et al. Mortality from circulatory system diseases and low-level radon exposure in the French cohort study of uranium miners, 1946–1999. *Scand J Work Environ Health*. 2010;36(5):373–383.
- Schubauer-Berigan MK, Daniels RD, Pinkerton LE. Radon exposure and mortality among white and American Indian uranium miners: an update of the Colorado Plateau cohort. *Am J Epidemiol*. 2009;169(6):718–730.
- Kreuzer M, Walsh L, Schnelzer M, et al. Radon and risk of extrapulmonary cancers: results of the German Uranium Miners' Cohort Study, 1960–2003. *Br J Cancer*. 2008;99(11):1946–1953.
- Rericha V, Kulich M, Rericha R, et al. Incidence of leukemia, lymphoma, and multiple myeloma in Czech uranium miners: a case-cohort study. *Environ Health Perspect*. 2006;114(6):818–822.
- Laurier D, Valenty M, Tirmarche M. Radon exposure and the risk of leukemia: a review of epidemiological studies. *Health Phys*. 2001;81(3):272–288.
- Wagner SE, Burch JB, Bottai M, et al. Groundwater uranium and cancer incidence in South Carolina. *Cancer Causes Control*. 2011;22(1):41–50.
- Auvinen A, Kurttio P, Pekkanen J, et al. Uranium and other natural radionuclides in drinking water and risk of leukemia: a case-cohort study in Finland. *Cancer Causes Control*. 2002;13(9):825–829.
- Auvinen A, Salonen L, Pekkanen J, et al. Radon and other natural radionuclides in drinking water and risk of stomach cancer: a case-cohort study in Finland. *Int J Cancer*. 2005;114(1):109–113.
- Kurttio P, Salonen L, Ilus T, et al. Well water radioactivity and risk of cancers of the urinary organs. *Environ Res*. 2006;102(3):333–338.
- Turner MC, Krewski D, Chen Y, et al. Radon and COPD mortality in the American Cancer Society cohort. *Eur Respir J*. 2012;39(5):1113–1119.
- Turner MC, Krewski D, Chen Y, et al. Residential radon and non-lung cancer mortality in the American Cancer Society cohort [abstract]. *Am J Epidemiol*. 2011;173(suppl 1):S98.
- Calle EE, Terrell DD. Utility of the National Death Index for ascertainment of mortality among Cancer Prevention Study II participants. *Am J Epidemiol*. 1993;137(2):235–241.
- World Health Organization. *International Classification of Diseases: Manual of the International Statistical Classification of Diseases, Injuries, and Causes of Death*. Geneva, Switzerland: World Health Organization; 1977.
- World Health Organization. *ICD-10: International Statistical Classification of Diseases and Related Health Problems*. Geneva, Switzerland: World Health Organization; 1992.
- Bureau of the Census. *Census of Population and Housing, 1980 (United States)*. Summary Tape File 3B. ICPSR Version. Washington, DC: US Department of Commerce; 1985.
- Price PN, Nero AV. Joint analysis of long- and short-term radon monitoring data from the northern U.S. *Environ Int*. 1996;22(suppl 1):S699–S714.

30. Price PN, Nero A, Revzan K, et al. Predicted parameters of radon distributions within counties in the 48 conterminous states. Berkeley, CA: E. O. Lawrence Berkeley National Laboratory; 2012. (<http://energy.lbl.gov/IEP/high-radon/ctypred.htm>). (Accessed September 25, 2012).
31. Cohen BL. A test of the linear-no threshold theory of radiation carcinogenesis. *Environ Res*. 1990;53(2):193–220.
32. Cohen BL. Compilation and integration of studies of radon levels in U.S. homes by states and counties. *Crit Rev Environ Cont*. 1992;22(3):243–364.
33. Cohen BL. Data provided through the University of Pittsburgh website. Pittsburgh, PA: University of Pittsburgh; 1996. (<ftp://ftp.pitt.edu/users/b/l/blc>). (Accessed May 20, 2010).
34. Cox D. Regression models and lifetables. *J R Stat Soc B*. 1972;34(2):187–220.
35. Siemiatycki J, Krewski D, Shi Y, et al. Controlling for potential confounding by occupational exposures. *J Toxicol Environ Health A*. 2003;66(16-19):1591–1603.
36. SAS Institute, Inc. SAS, version 9.2. Cary, NC: SAS Institute, Inc; 2008.
37. Steck DJ, Field RW. Dosimetric challenges for residential radon epidemiology. *J Toxicol Environ Health A*. 2006; 69(7):655–664.
38. Stidley CA, Samet JM. A review of ecologic studies of lung cancer and indoor radon. *Health Phys*. 1993;65(3): 234–251.
39. Krewski D, Mallick R, Zielinski JM, et al. Modeling seasonal variation in indoor radon concentrations. *J Expo Anal Environ Epidemiol*. 2005;15(3):234–243.
40. Darby S, Deo H, Doll R, et al. A parallel analysis of individual and ecological data on residential radon and lung cancer in south-west England. *J R Stat Soc A*. 2001;164(1): 193–203.
41. Lagarde F, Pershagen G. Parallel analyses of individual and ecologic data on residential radon, cofactors, and lung cancer in Sweden. *Am J Epidemiol*. 1999;149(3):268–274.
42. Field RW, Smith BJ, Steck DJ, et al. Residential radon exposure and lung cancer: variation in risk estimates using alternative exposure scenarios. *J Expo Anal Environ Epidemiol*. 2002;12(3):197–203.
43. Puskin JS. Smoking as a confounder in ecologic correlations of cancer mortality rates with average county radon levels. *Health Phys*. 2003;84(4):526–532.
44. Kendall GM, Smith TJ. Doses to organs and tissues from radon and its decay products. *J Radiol Prot*. 2002;22(4): 389–406.
